# Supplementary material for: SID-1 Domains Important for dsRNA Import in Caenorhabditis elegans
Source: PubMed Central journal article supplement (PMC5714486; doi:10.1534/g3.117.300308), 2017-10-12
Supplement: 3887FigureS2.pdf [file 3887FigureS2.pdf]

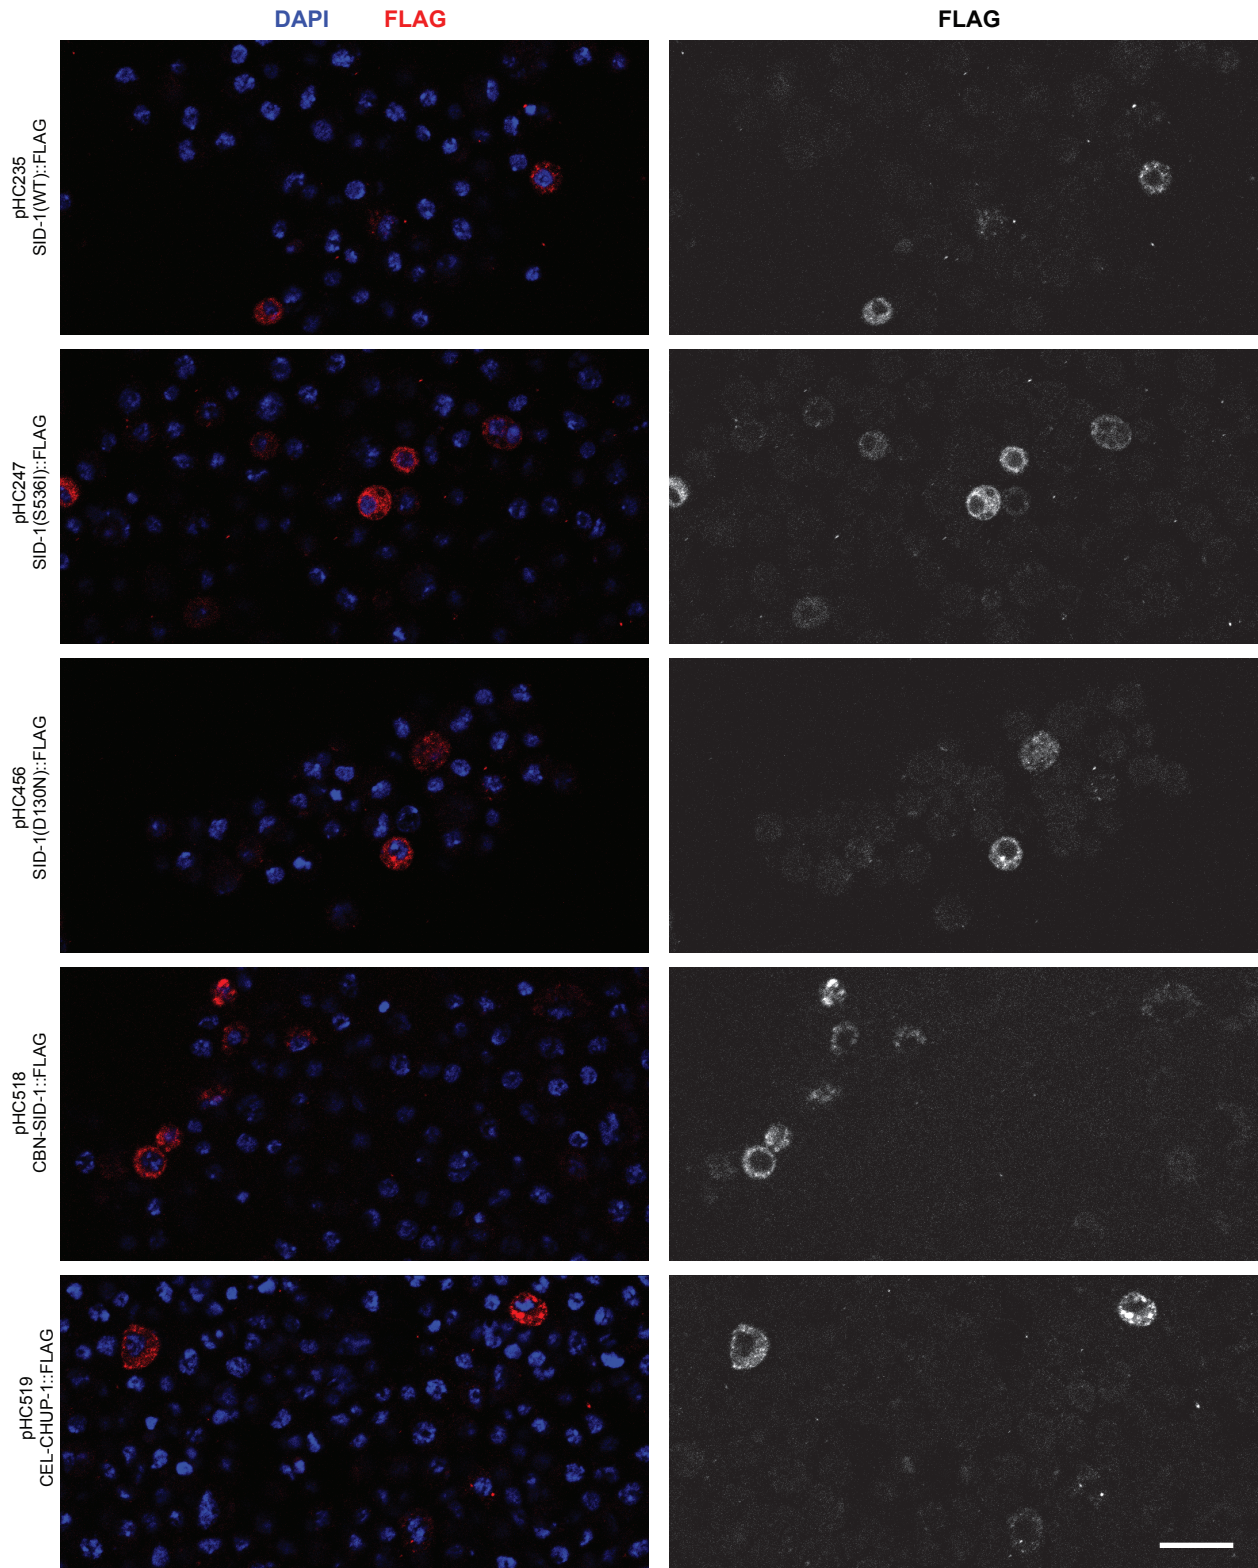

**Figure S2.** SID-1 homolog expression and localization in S2 cells. Anti-FLAG and DAPI staining (left column) and anti-FLAG staining only (right column) of *Drosophila* S2 cells transiently transfected with the indicated constructs. Scale bar 20  $\mu$ m.
