# Supplementary material for: SID-1 Domains Important for dsRNA Import in Caenorhabditis elegans
Source: PubMed Central journal article supplement (PMC5714486; doi:10.1534/g3.117.300308), 2017-10-12
Supplement: 3887FileS1.pdf [file 3887FileS1.pdf]

Table S1. Sequence analysis of *sid-1* alleles

| Allele                        | Mutation location (domain)     | DNA change                | Amino acid change | RNAi phenotype† | Reference           |
|-------------------------------|--------------------------------|---------------------------|-------------------|-----------------|---------------------|
| <i>qt6</i>                    | N terminus                     | AT <u>G</u> -ATA          | M1I               | Weak            | This study and (6)  |
| <i>qt84</i>                   | N terminus                     | CC <u>G</u> -TCG          | P108S             | Strong          | This study          |
| <i>qt95, qt117, [pk3321]*</i> | N terminus                     | GA <u>T</u> -AA <u>T</u>  | D130N             | Weak            | This study and (15) |
| <i>qt9, qt81</i>              | N terminus                     | CA <u>G</u> -I <u>A</u> G | Q154stop          | Strong          | This study and (6)  |
| <i>qt109</i>                  | N terminus                     | CG <u>G</u> -I <u>G</u> G | R172W             | Strong          | This study          |
| <i>qt11*, qt98, qt120</i>     | N terminus                     | GC <u>C</u> -A <u>C</u> C | A173T             | Weak            | This study and (6)  |
| <i>qt100, qt110</i>           | N terminus                     | CA <u>A</u> -I <u>A</u> A | Q174stop          | Strong          | This study          |
| <i>qt10</i>                   | N terminus                     | CC <u>G</u> -C <u>I</u> G | P199L             | Weak            | This study and (6)  |
| <i>qt97, qt104</i>            | N terminus                     | GG <u>A</u> -G <u>A</u> A | G201E             | Weak            | This study          |
| <i>qt113</i>                  | N terminus                     | GG <u>A</u> -A <u>G</u> A | G201R             | Strong          | This study          |
| <i>qt86</i>                   | N terminus                     | CA <u>A</u> -T <u>A</u> A | Q213stop          | Strong          | This study          |
| <i>qt5*, qt107</i>            | N terminus                     | CG <u>A</u> -I <u>G</u> A | R275stop          | Strong          | This study and (6)  |
| <i>qt91</i>                   | N terminus                     | TAC <u>-</u> TAA          | Y314stop          | Strong          | This study          |
| <i>qt7*, qt8*, qt82</i>       | TM1                            | CC <u>G</u> -C <u>I</u> G | P328L             | Strong          | This study and (6)  |
| <i>qt127</i>                  | IC loop between TM1 and TM2    | CA <u>G</u> -I <u>A</u> G | Q373stop          | Strong          | This study          |
| <i>qt92</i>                   | IC loop between TM1 and TM2    | CA <u>A</u> -I <u>A</u> A | Q402stop          | Strong          | This study          |
| <i>qt96</i>                   | EC loop between TM2 and TM3    | TGG <u>-</u> TG <u>A</u>  | W452stop          | Strong          | This study          |
| <i>qt99, qt103</i>            | EC loop between TM2 and TM3    | TG <u>C</u> -T <u>A</u> C | C464Y             | Strong          | This study          |
| <i>qt102</i>                  | EC loop between TM2 and TM3    | CG <u>A</u> -I <u>G</u> A | R478stop          | Strong          | This study          |
| <i>qt111</i>                  | TM3                            | GG <u>A</u> -G <u>A</u> A | G488E             | Strong          | This study          |
| <i>qt80</i>                   | TM3                            | GG <u>A</u> -A <u>G</u> A | G493R             | Strong          | This study          |
| <i>qt114</i>                  | TM4                            | CA <u>A</u> -I <u>A</u> A | Q532stop          | Strong          | This study          |
| <i>qt85</i>                   | TM4                            | A <u>I</u> T-A <u>A</u> T | I534N             | Weak            | This study          |
| <i>qt2*</i>                   | TM4                            | A <u>G</u> T-A <u>I</u> T | S536I             |                 | (6)                 |
| <i>qt118</i>                  | MR5                            | CA <u>A</u> -I <u>A</u> A | Q556stop          | Strong          | This study          |
| <i>qt112</i>                  | MR5                            | TG <u>T</u> -T <u>A</u> T | C559Y             | Strong          | This study          |
| <i>qt4, qt93, qt115</i>       | EC loop between MR5 and TM6    | CG <u>T</u> -I <u>G</u> T | R565C             | Strong          | This study and (6)  |
| <i>qt125</i>                  | EC loop between MR5 and TM6    | CG <u>T</u> -I <u>G</u> T | R570C             | Strong          | This study          |
| <i>qt87</i>                   | IC loop between MR7 and MR8    | CG <u>A</u> -I <u>G</u> A | R633stop          | Strong          | This study          |
| <i>qt90</i>                   | EC loop between MR10 and MR11  | CA <u>C</u> -I <u>A</u> C | H740Y             | Strong          | This study          |
| <i>qt101</i>                  | EC loop between MR10 and MR11  | TGG <u>-</u> TG <u>A</u>  | W743stop          | Strong          | This study          |
| <i>qt130</i>                  | MR11                           | GG <u>A</u> -A <u>G</u> A | G747R             | Strong          | This study          |
| <i>qt12*</i>                  | Splice donor site              | G482A                     | Non-coding        |                 | (6)                 |
| <i>qt129</i>                  | Splice acceptor site           | G524A                     | Non-coding        | Strong          | This study          |
| <i>qt89, qt108</i>            | Splice donor site              | G5855A                    | Non-coding        | Strong          | This study          |
| <i>qt106</i>                  | G to A, 24bp downstream of TAG | 3'UTR                     | Non-coding        | Strong          | This study          |
| <i>qt78</i>                   | 385bp deletion from 3430-3815  | Deletion                  |                   | Strong          | This study          |
| <i>qt83</i>                   | 338bp deletion from 5323-5661  | Deletion                  |                   | Strong          | This study          |
| <i>qt88</i>                   | 465bp deletion from 2003-2468  | Deletion                  |                   | Strong          | This study          |
| <i>qt116</i>                  | 158bp deletion from 5477-5635  | Deletion                  |                   | Strong          | This study          |
| <i>qt119</i>                  | 378bp deletion from 6101-6479  | Deletion                  |                   | Strong          | This study          |
| <i>qt126</i>                  | Deletion from ~3600-4000       | Deletion                  |                   | Strong          | This study          |
| <i>qt128</i>                  | 372bp deletion from 2005-2377  | Deletion                  |                   | Strong          | This study          |

Table S2. Strong *sid-1* alleles on tissue-specific environmental RNAi

| Mutation                        | Strain or Allele | <i>act-5 RNAi</i><br>gut |       | <i>bli-1 RNAi</i><br>hypodermis |       | <i>unc-22 RNAi</i><br>muscle |       | <i>unc-45 RNAi</i><br>muscle, germline |           |       | <i>fkh-6 RNAi</i><br>somatic gonad |       |
|---------------------------------|------------------|--------------------------|-------|---------------------------------|-------|------------------------------|-------|----------------------------------------|-----------|-------|------------------------------------|-------|
|                                 |                  | % Arr                    | (n)   | % Bli                           | (n)   | % Unc                        | (n)   | % Unc                                  | Fertility | (n)   | Fertility                          | (n)   |
| CONTROLS                        |                  |                          |       |                                 |       |                              |       |                                        |           |       |                                    |       |
|                                 | N2               | 100                      | (111) | 100                             | (115) | 100                          | (173) | 100                                    | Sterile   | (237) | Sterile                            | (173) |
|                                 | HC57             | 100                      | (64)  | 100                             | (34)  | 100                          | (43)  | 100                                    | Sterile   | (48)  | Sterile                            | (12)  |
| NONSENSE AND NON-CODING, STRONG |                  |                          |       |                                 |       |                              |       |                                        |           |       |                                    |       |
| Q154stop                        | <i>qt9</i>       | 0                        | (98)  | 0                               | (37)  | 0                            | (60)  | 0                                      | Fertile   | (24)  | Fertile                            | (35)  |
| Q154stop                        | <i>qt81</i>      | 0                        | (57)  | 0                               | (33)  | 0                            | (58)  | 0                                      | Fertile   | (68)  | Fertile                            | (24)  |
| Q174stop                        | <i>qt100</i>     | 0                        | (18)  | 6                               | (32)  | 0                            | (35)  | 0                                      | Fertile   | (24)  | Fertile                            | (29)  |
| Q174stop                        | <i>qt110</i>     | 0                        | (24)  | 0                               | (19)  | 0                            | (81)  | 0                                      | Fertile   | (74)  | Fertile                            | (50)  |
| Q213stop                        | <i>qt86</i>      | 0                        | (50)  | ND                              |       | 0                            | (31)  | 0                                      | Fertile   | (62)  | Fertile                            | (57)  |
| R275stop                        | <i>qt107</i>     | 0                        | (18)  | 0                               | (20)  | 0                            | (48)  | 0                                      | Fertile   | (42)  | Fertile                            | (47)  |
| Y314stop                        | <i>qt91</i>      | 0                        | (25)  | ND                              |       | 0                            | (51)  | 0                                      | Fertile   | (33)  | Fertile                            | (38)  |
| Q373stop                        | <i>qt127</i>     | 0                        | (23)  | 0                               | (17)  | 0                            | (19)  | 0                                      | Fertile   | (14)  | Fertile                            | (17)  |
| Q402stop                        | <i>qt92</i>      | 0                        | (16)  | 6                               | (33)  | 0                            | (17)  | 0                                      | Fertile   | (31)  | Fertile                            | (33)  |
| R478stop                        | <i>qt102</i>     | 0                        | (20)  | 0                               | (19)  | 0                            | (18)  | 0                                      | Fertile   | (22)  | Fertile                            | (18)  |
| W452stop                        | <i>qt96</i>      | 0                        | (35)  | 0                               | (34)  | 6                            | (35)  | 0                                      | Fertile   | (30)  | Fertile                            | (35)  |
| Q532stop                        | <i>qt114</i>     | 0                        | (27)  | 0                               | (22)  | 0                            | (22)  | 0                                      | Fertile   | (24)  | Fertile                            | (18)  |
| Q556stop                        | <i>qt118</i>     | 0                        | (23)  | 0                               | (9)   | 0                            | (15)  | 0                                      | Fertile   | (14)  | Fertile                            | (25)  |
| R633stop                        | <i>qt87</i>      | 0                        | (43)  | ND                              |       | 0                            | (44)  | 0                                      | Fertile   | (41)  | Fertile                            | (35)  |
| W743stop                        | <i>qt101</i>     | 0                        | (20)  | 0                               | (33)  | 0                            | (30)  | 0                                      | Fertile   | (27)  | Fertile                            | (41)  |
| Δ2003-2468                      | <i>qt88</i>      | 0                        | (65)  | ND                              |       | 0                            | (58)  | 0                                      | Fertile   | (50)  | Fertile                            | (41)  |
| Δ2005-2377                      | <i>qt128</i>     | 0                        | (14)  | 0                               | (18)  | 0                            | (23)  | 0                                      | Fertile   | (20)  | Fertile                            | (16)  |
| Δ3430-3815                      | <i>qt78</i>      | 0                        | (30)  | 0                               | (10)  | 0                            | (16)  | 4                                      | Fertile   | (23)  | Fertile                            | (11)  |
| ~Δ3600-4000                     | <i>qt126</i>     | 0                        | (21)  | 0                               | (17)  | 0                            | (21)  | 0                                      | Fertile   | (14)  | Fertile                            | (11)  |
| Δ5323-5661                      | <i>qt83</i>      | 0                        | (57)  | 0                               | (53)  | 0                            | (67)  | 0                                      | Fertile   | (63)  | Fertile                            | (32)  |
| Δ5477-5635                      | <i>qt116</i>     | 0                        | (25)  | 0                               | (26)  | 0                            | (18)  | 0                                      | Fertile   | (14)  | Fertile                            | (21)  |
| Δ6101-6479                      | <i>qt119</i>     | 0                        | (22)  | 0                               | (25)  | 0                            | (44)  | 0                                      | Fertile   | (32)  | Fertile                            | (29)  |
| SAS G524A                       | <i>qt129</i>     | 0                        | (28)  | 0                               | (33)  | 0                            | (27)  | 0                                      | Fertile   | (30)  | Fertile                            | (21)  |
| SDS G5855A                      | <i>qt89</i>      | 0                        | (33)  | ND                              |       | 0                            | (43)  | 0                                      | Fertile   | (34)  | Fertile                            | (35)  |
| SDS G5855A                      | <i>qt108</i>     | 0                        | (18)  | 0                               | (12)  | 0                            | (56)  | 0                                      | Fertile   | (45)  | Fertile                            | (28)  |
| 3'UTR G6649A                    | <i>qt106</i>     | 0                        | (12)  | 0                               | (14)  | 0                            | (39)  | 0                                      | Fertile   | (40)  | Fertile                            | (13)  |
| MISSENSE, STRONG                |                  |                          |       |                                 |       |                              |       |                                        |           |       |                                    |       |
| P108S                           | <i>qt84</i>      | 0                        | (75)  | 0                               | (31)  | 0                            | (66)  | 0                                      | Fertile   | (60)  | Fertile                            | (32)  |
| R172W                           | <i>qt109</i>     | 0                        | (24)  | 0                               | (18)  | 0                            | (34)  | 0                                      | Fertile   | (56)  | Fertile                            | (35)  |
| G201R                           | <i>qt113</i>     | 0                        | (30)  | 0                               | (20)  | 0                            | (33)  | 0                                      | Fertile   | (14)  | Fertile                            | (18)  |
| P328L                           | <i>qt82</i>      | 0                        | (21)  | 0                               | (27)  | 0                            | (33)  | 0                                      | Fertile   | (28)  | Fertile                            | (9)   |
| C464Y                           | <i>qt99</i>      | 0                        | (20)  | 0                               | (36)  | 0                            | (36)  | 0                                      | Fertile   | (42)  | Fertile                            | (33)  |
| C464Y                           | <i>qt103</i>     | 0                        | (20)  | 0                               | (41)  | 3                            | (35)  | 0                                      | Fertile   | (38)  | Fertile                            | (24)  |
| G488E                           | <i>qt111</i>     | 0                        | (9)   | 0                               | (20)  | 0                            | (44)  | 0                                      | Fertile   | (51)  | Fertile                            | (47)  |
| G493R                           | <i>qt80</i>      | 0                        | (48)  | 0                               | (51)  | 0                            | (86)  | 0                                      | Fertile   | (52)  | Fertile                            | (45)  |
| C559Y                           | <i>qt112</i>     | 0                        | (28)  | 0                               | (23)  | 0                            | (50)  | 0                                      | Fertile   | (53)  | Fertile                            | (48)  |
| R565C                           | <i>qt93</i>      | 0                        | (28)  | 0                               | (20)  | 0                            | (24)  | 0                                      | Fertile   | (23)  | Fertile                            | (16)  |
| R565C                           | <i>qt115</i>     | 0                        | (36)  | 0                               | (37)  | 0                            | (24)  | 0                                      | Fertile   | (27)  | Fertile                            | (31)  |
| R570C                           | <i>qt125</i>     | 0                        | (38)  | 0                               | (15)  | 0                            | (28)  | 0                                      | Fertile   | (19)  | Fertile                            | (16)  |
| H740Y                           | <i>qt90</i>      | 0                        | (46)  | ND                              |       | 0                            | (45)  | 0                                      | Fertile   | (41)  | Fertile                            | (46)  |
| G747R                           | <i>qt130</i>     | 0                        | (18)  | 0                               | (29)  | 0                            | (33)  | 0                                      | Fertile   | (38)  | Fertile                            | (24)  |

L1-L2 staged larvae were placed on bacteria expressing dsRNA at 20°C and were scored as young adults for the RNAi phenotypes. N2, wild type strain. HC57, background strain for all *sid-1* mutants. Arr, arrested; Bli, blistered cuticle; Unc, uncoordinated (*unc-45* RNAi animals are paralyzed, *unc-22* RNAi animals are twitching). Fertility was scored qualitatively: sterile (no progeny), fertile (many progeny), decreased (few progeny). (n), number of animals scored. ND, not determined.

Table S3. Sequences of primers used in this study.

A. For amplification and sequencing of the *sid-1* gene, C04F5.1

| Primer                | C04F5.1 starting nucleotide | Sequence                |
|-----------------------|-----------------------------|-------------------------|
| LGV W F               | 5' UTR                      | ggctatgagagggtcgagag    |
| C04F5.1 F1            | 5' UTR                      | ttttcccttcattttccatttt  |
| C04F5.1 F2            | 283                         | gcgaaatcggtgattcttc     |
| C04F5.1 F3            | 796                         | gcgaatgtacggtatttgct    |
| C04F5.1 F4            | 1352                        | cggaagaaaaattacctgattgg |
| C04F5.1 F5            | 1889                        | tcgatcagtgattccgataaa   |
| C04F5.1 F6            | 2263                        | gatttgagccatgatgagca    |
| C04F5.1 F7            | 2719                        | cgaattgtcggagtggaaat    |
| C04F5.1 F8            | 4268                        | cgagcccagcgatacagtag    |
| C04F5.1 F9            | 4750                        | tgggttgacgtaaatgcaa     |
| C04F5.1 F10           | 5297                        | cccataaacatgaactgtcc    |
| C04F5.1 F11           | 5781                        | ttgtggagctctgtcactgc    |
| C04F5.1 R1            | 3' UTR                      | gcaaacgagcaattgtgaag    |
| C04F5.1 R2            | 6526                        | gtgccataaatcgtgggaac    |
| C04F5.1 R3            | 6000                        | cgggaaattaccgaaattga    |
| C04F5.1 R4            | 5539                        | gatcgatccaacgacaatga    |
| C04F5.1 R5            | 5021                        | aatcgcaataagacagcctga   |
| C04F5.1 R6            | 4483                        | ggtgaaaattggcgaagaa     |
| C04F5.1 R7            | 3062                        | tgaaacggccgacttttact    |
| C04F5.1 R8            | 2471                        | tcaagccaaatatccgaag     |
| C04F5.1 R9            | 2012                        | cgggagctatgaagacgaag    |
| C04F5.1 R10           | 1550                        | tttgaaaaatcaagcaaaaa    |
| C04F5.1 R11           | 1004                        | tgatcgattcaaacaaaattcg  |
| C04F5.1 R12           | 500                         | tttaggccaaaagcctacc     |
| C04F5.1 new genomic F | 3769                        | cacaatcatgctgtgtctc     |
| C04F5.1 new genomic R | 3877                        | tcatgacggcctcttctaca    |
| <i>sid-1</i> Exon 5 F | 3473                        | cgcgccatcatagatttta     |
| <i>sid-1</i> Exon 5 R | 4002                        | catcactggggcaaatatga    |
| <i>sid-1</i> Exon 3 R | 827                         | ttgaaatttaagcaaaatccgta |

B. For amplification of the *cbn-sid-1* promoter, gene (CBN00847) and 3' UTR

| Primer                     | Sequence              |
|----------------------------|-----------------------|
| AW179_cbn-sid-1 genomic_F1 | tggcatgagttctgaaatgaa |
| AW180_cbn-sid-1 genomic_R1 | tgtcaagttcaagtggaag   |

C. For cloning *sid-1* homolog cDNAs onto pPacPL and site-directed mutagenesis of the *sid-1* cDNA sequence on pH235.

| Primer                            | Sequence                                       |
|-----------------------------------|------------------------------------------------|
| AW168_cbn-sid-1 cDNA+overlap_F    | tagactcgagccgcaatgaaaggcagcggctcc              |
| AW169_cbn-sid-1 cDNA+overlap_R    | ctgtcgtcgtcgtcctttagtagcatacagttaattgcggattttg |
| AW170_pPacPL backbone plus flag_F | gactacaaggacgacgacg                            |

|                                        |                                                |
|----------------------------------------|------------------------------------------------|
| AW171_pPacPL backbone plus flag_F      | tgcggtcgagtctagag                              |
| AW205_tag-130 cDNA+overlap_F           | tagactcgagccgcaatgaggacctcacaggcg              |
| AW206_tag-130 cDNA+overlap_R           | cttgctgctgctccttgtagtcgaaaactgaattgtattcctcatc |
| 3428 qt95 Forward (D130N substitution) | caatccgctcgttgagcaaaattcggggcgacagaaag         |
| 3429 qt95 Reverse (D130N substitution) | cttctgtgcgccccgaaatttgctcaacgagcggattg         |

D. For gut and muscle rescue of *sid-1*

| Primer | Sequence             |
|--------|----------------------|
| P5     | cattggcgaggagccatg   |
| P23    | gtacgacagaaagcacttcg |
| P37    | gcggcatggtttggaac    |
| P38    | cagttcaagacagttgggtg |

Table S4. Strains used in this study

| Strain     | Genotype                                                                                                |
|------------|---------------------------------------------------------------------------------------------------------|
| N2 Bristol | wild type                                                                                               |
| HC195      | <i>nrls20 [sur-5::NLS-gfp] IV</i>                                                                       |
| HC196      | <i>sid-1(qt9) V</i>                                                                                     |
| HC393      | <i>sid-1(qt9) V; qtEx89 [sur-5::NLS-gfp + sid-1(+)]</i>                                                 |
| HC566      | <i>nrls20 [sur-5::NLS-gfp] IV; sid-1(qt9) V</i>                                                         |
| HC757      | <i>nrls20 [sur-5::NLS-gfp] IV; sid-1(qt95) V</i>                                                        |
| HC57       | <i>ccls4251[myo-3::NLS-gfp, myo-3::MITO-gfp] I; qtIs3 [myo-2::GFP dsRNA] III; mIs11 [myo-2::GFP] IV</i> |
| HC303      | <i>sid-1(qt6) V</i>                                                                                     |
| HC94       | <i>sid-1(qt10) V</i>                                                                                    |
| HC653      | <i>sid-1(qt78) V</i>                                                                                    |
| HC655      | <i>sid-1(qt80) V</i>                                                                                    |
| HC656      | <i>sid-1(qt81) V</i>                                                                                    |
| HC657      | <i>sid-1(qt82) V</i>                                                                                    |
| HC658      | <i>sid-1(qt83) V</i>                                                                                    |
| HC659      | <i>sid-1(qt84) V</i>                                                                                    |
| HC660      | <i>sid-1(qt85) V</i>                                                                                    |
| HC661      | <i>sid-1(qt86) V</i>                                                                                    |
| HC662      | <i>sid-1(qt87) V</i>                                                                                    |
| HC663      | <i>sid-1(qt88) V</i>                                                                                    |
| HC664      | <i>sid-1(qt89) V</i>                                                                                    |
| HC665      | <i>sid-1(qt90) V</i>                                                                                    |
| HC666      | <i>sid-1(qt91) V</i>                                                                                    |
| HC667      | <i>sid-1(qt92) V</i>                                                                                    |
| HC668      | <i>sid-1(qt93) V</i>                                                                                    |
| HC670      | <i>sid-1(qt95) V</i>                                                                                    |
| HC671      | <i>sid-1(qt96) V</i>                                                                                    |
| HC672      | <i>sid-1(qt97) V</i>                                                                                    |
| HC673      | <i>sid-1(qt98) V</i>                                                                                    |
| HC674      | <i>sid-1(qt99) V</i>                                                                                    |
| HC675      | <i>sid-1(qt100) V</i>                                                                                   |
| HC676      | <i>sid-1(qt101) V</i>                                                                                   |
| HC677      | <i>sid-1(qt102) V</i>                                                                                   |
| HC678      | <i>sid-1(qt103) V</i>                                                                                   |
| HC679      | <i>sid-1(qt104) V</i>                                                                                   |
| HC681      | <i>sid-1(qt106) V</i>                                                                                   |
| HC682      | <i>sid-1(qt107) V</i>                                                                                   |
| HC683      | <i>sid-1(qt108) V</i>                                                                                   |
| HC684      | <i>sid-1(qt109) V</i>                                                                                   |
| HC685      | <i>sid-1(qt110) V</i>                                                                                   |
| HC686      | <i>sid-1(qt111) V</i>                                                                                   |
| HC687      | <i>sid-1(qt112) V</i>                                                                                   |
| HC688      | <i>sid-1(qt113) V</i>                                                                                   |
| HC689      | <i>sid-1(qt114) V</i>                                                                                   |
| HC690      | <i>sid-1(qt115) V</i>                                                                                   |

|        |                                                                                         |
|--------|-----------------------------------------------------------------------------------------|
| HC691  | <i>sid-1(qt116) V</i>                                                                   |
| HC692  | <i>sid-1(qt117) V</i>                                                                   |
| HC693  | <i>sid-1(qt118) V</i>                                                                   |
| HC694  | <i>sid-1(qt119) V</i>                                                                   |
| HC709  | <i>sid-1(qt120) V</i>                                                                   |
| HC714  | <i>sid-1(qt125) V</i>                                                                   |
| HC715  | <i>sid-1(qt126) V</i>                                                                   |
| HC716  | <i>sid-1(qt127) V</i>                                                                   |
| HC717  | <i>sid-1(qt128) V</i>                                                                   |
| HC718  | <i>sid-1(qt129) V</i>                                                                   |
| HC719  | <i>sid-1(qt130) V</i>                                                                   |
| HC935  | <i>sid-1(qt95) V; qtEx157[sid-2::sid-1 cDNA, myo-3::dsRed]</i>                          |
| HC936  | <i>sid-1(qt95) V; qtEx157[sid-2::sid-1 cDNA, myo-3::dsRed]</i>                          |
| HC937  | <i>sid-1(qt95) V; qtEx158[myo-3::sid-1 cDNA, myo-3::dsRed]</i>                          |
| HC938  | <i>sid-1(qt95) V; qtEx158[myo-3::sid-1 cDNA, myo-3::dsRed]</i>                          |
| HC1034 | <i>sid-1(qt9) V; qtEx195[cbn-sid-1 promoter::cbn-sid-1::3'UTR; pHC183 myo-3::dsRed]</i> |
| PB2801 | <i>Caenorhabditis brenneri</i> , outcrossed x20                                         |

---

Strains HC94 and HC653 through HC719 are in the HC57 strain background.
